# Supplementary material for: Multifunctional fluorescent ionic liquid crystals based on l-tryptophan and gemini surfactants for Cu(ii) and ascorbic acid detection in real samples
Source: Royal Society of Chemistry journal article supplement (doi:10.1039/d5sm00404g), 2025-01-01
Supplement: d5sm00404g1.pdf [file d5sm00404g1.pdf]

## **Supporting Information**

**Multifunctional fluorescent ionic liquid crystals based on L-Tryptophan and gemini surfactants for Cu (II) and ascorbic acid detection in real samples**

**Muhammad Bilal Ahmad, Rabia Arif and Arifa Shaheen\***

*Department of Chemistry, Aligarh Muslim University, Aligarh, India*

## **Real sample preparation**

A food sample consisting of 2.0 g each of coffee, green tea, and black tea was placed in a porcelain crucible and burned with a flame. The resulting three powder samples were calcined at 550 °C for about 5 hours. After cooling, 10 mL of concentrated HNO<sub>3</sub> and 5 mL of 30% hydrogen peroxide were added, and the mixture was heated until dry. Subsequently, 25 mL of water was added to the residue. Aliquots of these prepared solutions were used for analysis.<sup>1</sup> The fluorescent ILCs ([C<sub>12</sub>Im3OHImC<sub>12</sub>]<sup>+</sup>·2Trp<sup>-</sup>) were directly mixed with diluted 5 mL of the digested solution.

The standard addition method was utilized to determine the presence of ascorbic acid (AA) in real samples. The procedure involved taking 4 mL of various samples including orange, tomato, pomegranate juice, as well as human blood serum diluted tenfold, without any additional treatment. 2.5 mL of previously prepared GIL-12 was taken in a cuvette followed by the addition of known volume of aqueous stock solution of AA.<sup>2</sup> The fluorescence emission spectra were recorded using an excitation wavelength of 280 nm.

## **Determination of Cu<sup>2+</sup> ions and ascorbic acid in real samples**

The prepared real samples were spiked with Cu<sup>2+</sup> and ascorbic acid at varying concentrations (10 and 20 μM). Fluorescence spectra were captured using an excitation wavelength of 280 nm. Each concentration was measured three times, and the results were used to calculate the percentage recovery.

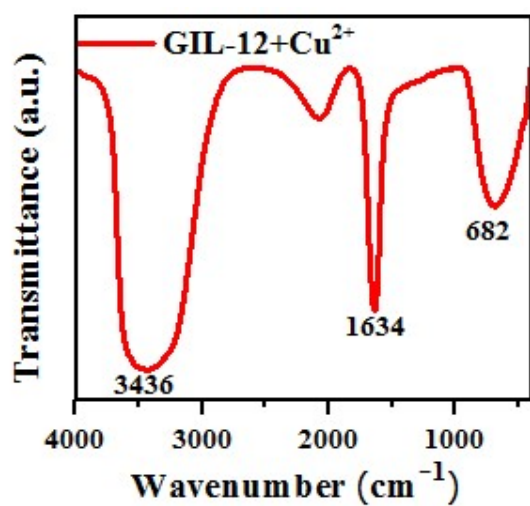

**Fig. S1** FT-IR spectrum of GIL-12 with Cu<sup>2+</sup> sensing

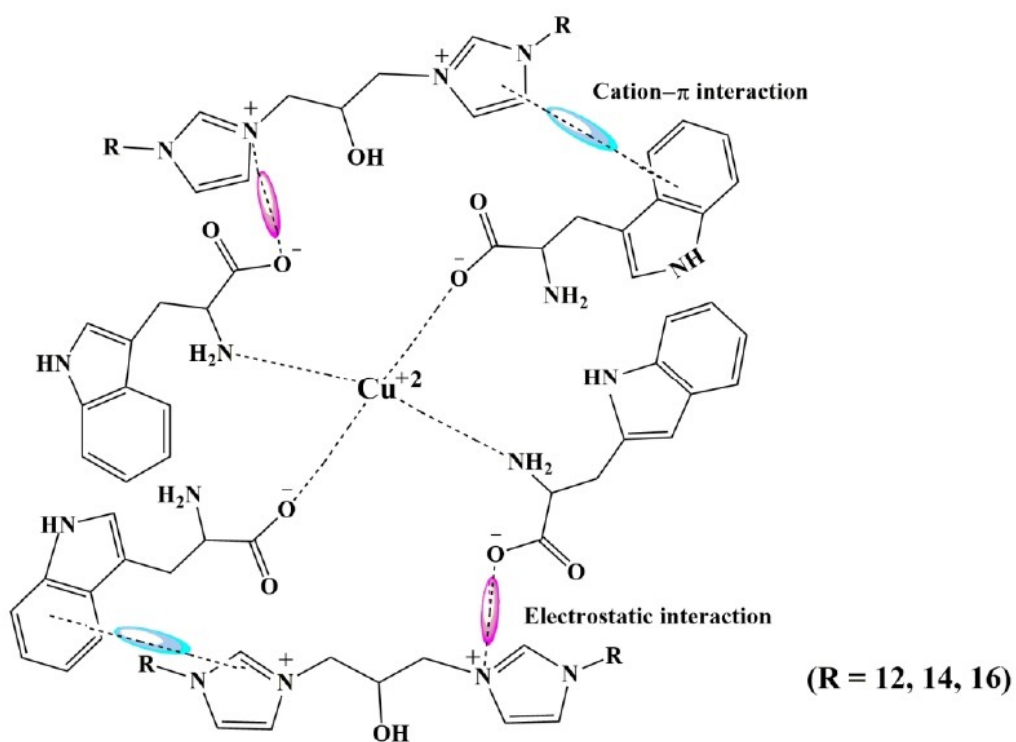

**Scheme S1** Sensing mechanism of GIL-12 with Cu<sup>2+</sup>

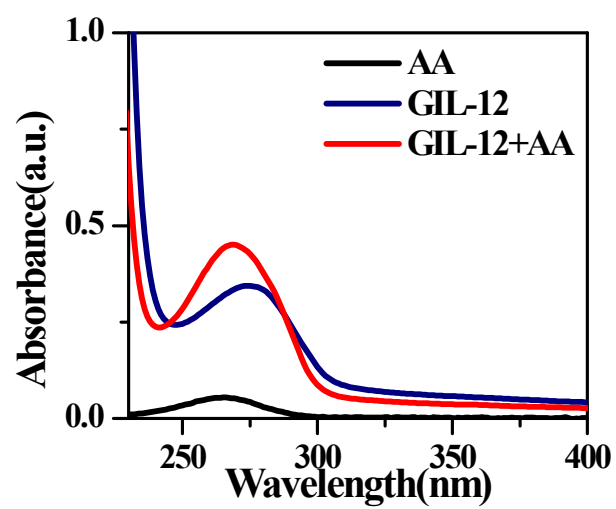

**Fig. S2** UV-Visible spectra of GIL-12 with and without AA

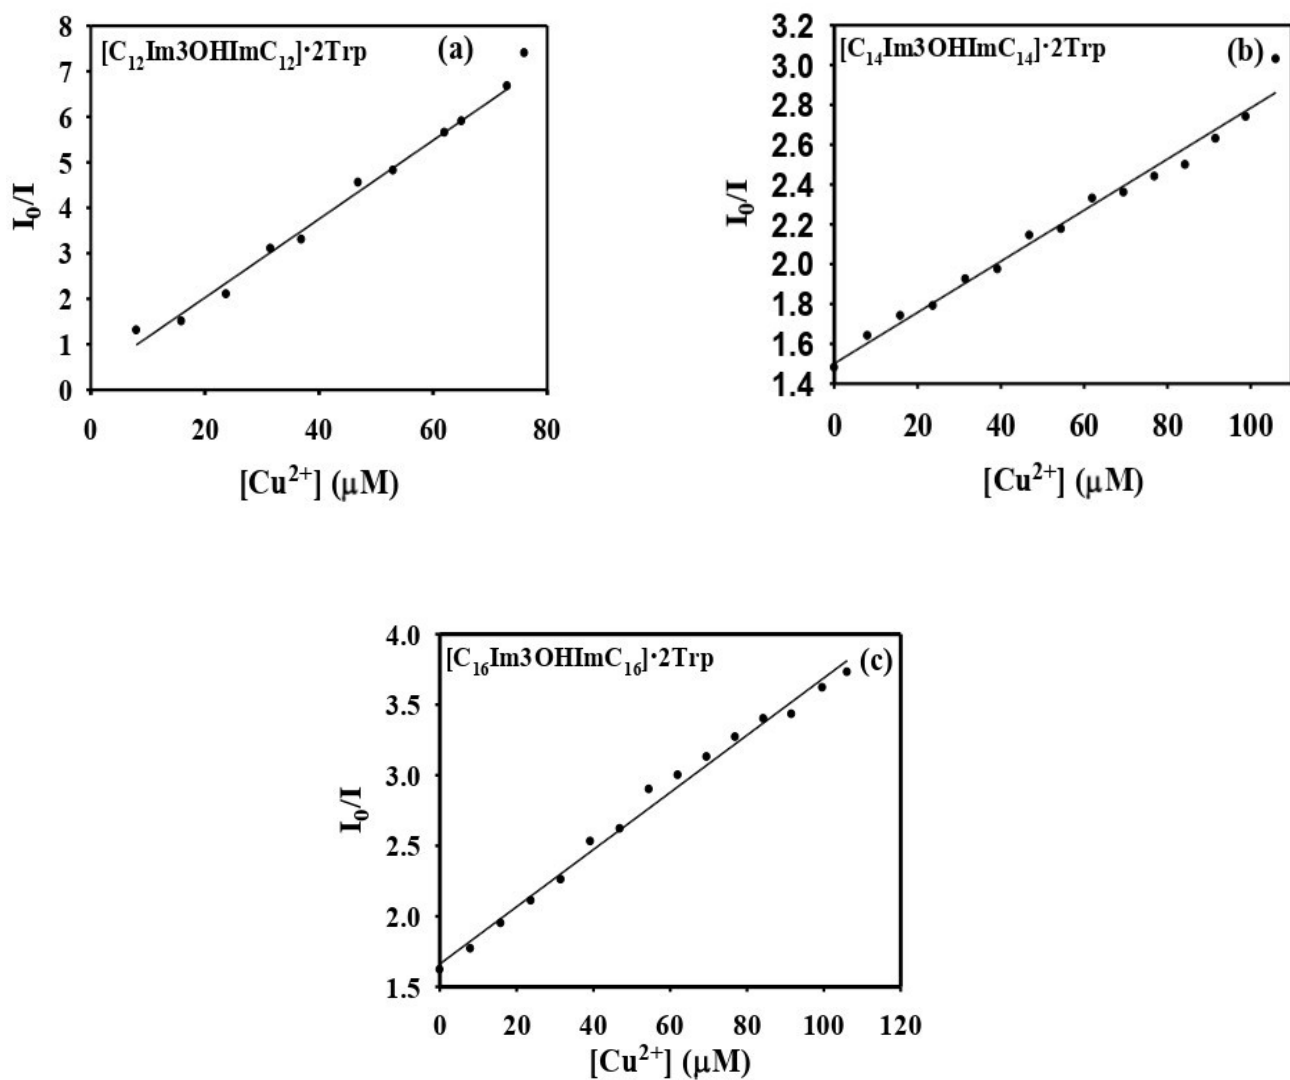

**Fig. S3** Plot of  $I_0/I$  versus  $[Cu^{2+}]$  for (a)  $[C_{12}Im_3OHImC_{12}] \cdot 2Trp$  (b)  $[C_{14}Im_3OHImC_{14}] \cdot 2Trp$  and (c)  $[C_{16}Im_3OHImC_{16}] \cdot 2Trp$  at wavelength of 350 nm.

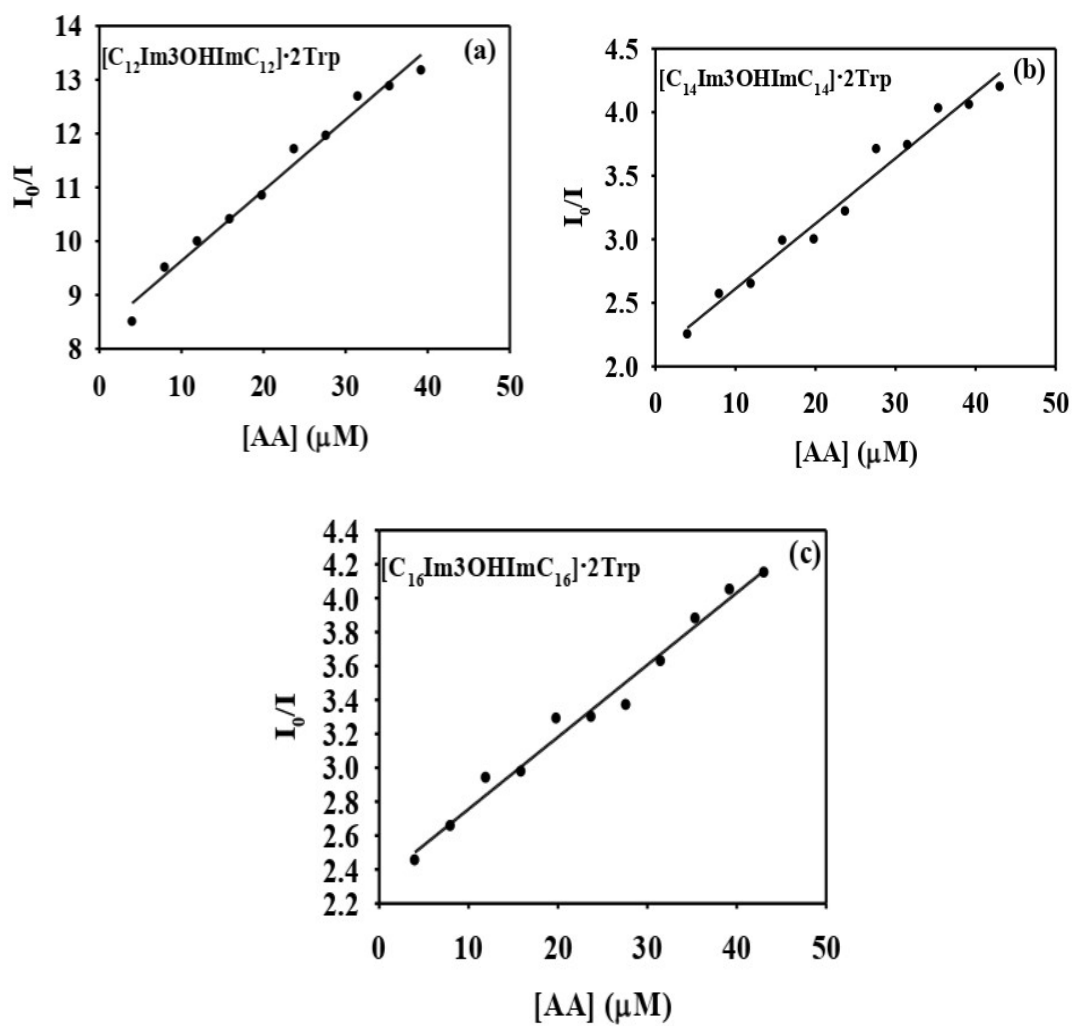

**Fig. S4** Plot of  $I_0/I$  versus [AA] for (a)  $[C_{12}\text{Im3OHImC}_{12}] \cdot 2\text{Trp}$  (b)  $[C_{14}\text{Im3OHImC}_{14}] \cdot 2\text{Trp}$  and (c)  $[C_{16}\text{Im3OHImC}_{16}] \cdot 2\text{Trp}$  at wavelength of 350 nm

**Table S1** Comparison of the proposed and previously reported methods for Cu<sup>2+</sup> determination

| Sample                                                             | Method        | Ions             | LOD (μM) | Linear range                                  | Ref.      |
|--------------------------------------------------------------------|---------------|------------------|----------|-----------------------------------------------|-----------|
| <b>PGE/PA/Cu-Car</b>                                               | Potentiometry | Cu <sup>2+</sup> | 2.00     | $5.0 \times 10^{-6}$ - $1.0 \times 10^{-1}$ M | 47        |
| <b>MALDI-TOF</b>                                                   | Calorimetry   | Cu <sup>2+</sup> | 2.80     | 20-45 μM                                      | 48        |
| <b>Sulfur quantum dots (SQDs)</b>                                  | Fluorescence  | Cu <sup>2+</sup> | 6.78     | 20-200 μM                                     | 49        |
| <b>NANO-PAMAM-CHT</b>                                              | Fluorescence  | Cu <sup>2+</sup> | 16.9     | 0-25 μM                                       | 50        |
| <b>[C<sub>12</sub>Im3OHImC<sub>12</sub>]<math>\cdot</math>2Trp</b> | Fluorescence  | Cu <sup>2+</sup> | 4.59     | 7.97-76.92 μM                                 | This work |
| <b>[C<sub>14</sub>Im3OHImC<sub>14</sub>]<math>\cdot</math>2Trp</b> | Fluorescence  | Cu <sup>2+</sup> | 6.22     | 7.97-106 μM                                   | This work |
| <b>[C<sub>16</sub>Im3OHImC<sub>16</sub>]<math>\cdot</math>2Trp</b> | Fluorescence  | Cu <sup>2+</sup> | 5.11     | 7.97-105 μM                                   | This work |

**Table S2** Comparison of the proposed and previously reported methods for ascorbic acid (AA) determination

| Sample                                                            | Method       | Analyte | LOD (μM) | Linear range (μM) | Ref.      |
|-------------------------------------------------------------------|--------------|---------|----------|-------------------|-----------|
| <b>GSH-AuNCs</b>                                                  | Fluorescence | AA      | 200      | 350-700           | 51        |
| <b>SAIL-capped ZnS QDs</b>                                        | Fluorescence | AA      | 63.11    | 50-476            | 52        |
| <b>Co<sub>2</sub>P hybrid</b>                                     | DPV          | AA      | 17.80    | 100-4500          | 53        |
| <b>C<sub>12</sub>Im3OHImC<sub>12</sub>]<math>\cdot</math>2Trp</b> | Fluorescence | AA      | 3.42     | 3.99-40.00        | This work |
| <b>C<sub>14</sub>Im3OHImC<sub>14</sub>]<math>\cdot</math>2Trp</b> | Fluorescence | AA      | 4.11     | 3.99-35.36        | This work |
| <b>C<sub>16</sub>Im3OHImC<sub>16</sub>]<math>\cdot</math>2Trp</b> | Fluorescence | AA      | 3.55     | 3.99-35.36        | This work |

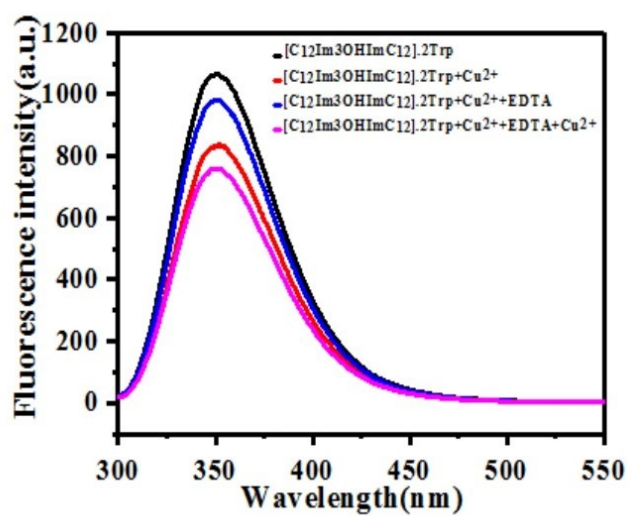

**Fig. S5** Fluorescence intensity of [C<sub>12</sub>Im<sub>3</sub>OHImC<sub>12</sub>].2Trp (10 μM) during alternating additions of Cu<sup>2+</sup> and EDTA.

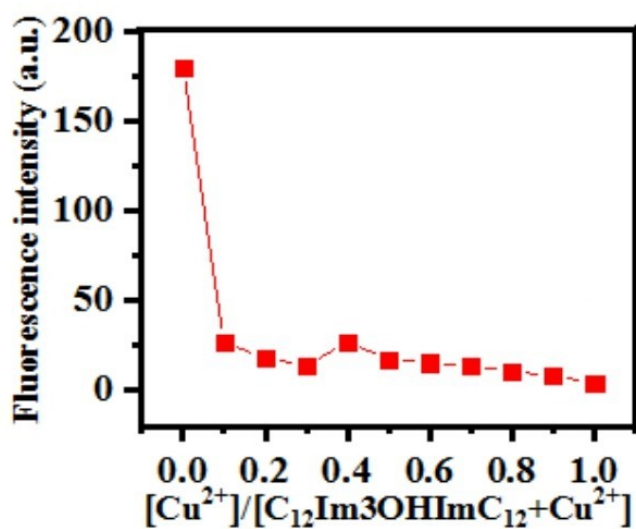

**Fig. S6** Job's plot for [C<sub>12</sub>Im<sub>3</sub>OHImC<sub>12</sub>].2Trp and Cu<sup>2+</sup> with a combined total concentration of [ILC] + [Cu<sup>2+</sup>] = 20 μM.

## References

- 1 Z. Ghubish, R. Kamal, H. R Mahmoud, M. Saif, H. Hafez, and M. El-Kemary, *RSC advances*, 2021, **11**, 18552-18564.
- 2 Y. Li, J. J Xia, J. Z Lu., Z. L Wang, and M. T. Wang, *Dyes and Pigments*, 2024, **227**, 112197.
